# Supplementary material
Source: HighWire-hosted journal article supplement (https://bmjopen.bmj.com/content/10/2/e032997)
Supplement: inline-supplementary-material-2 [file inline-supplementary-material-2.pdf]

Participant ID  
Number:

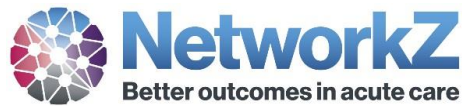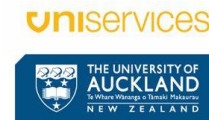

## Teamwork Perceptions Survey

**Please rate the following components of teamwork in the operating theatre teams where you regularly work.** We acknowledge that your experiences will vary between different theatre teams. Please try to give an **average rating** for your experiences of teamwork across the theatres where you regularly work, rather than rating one specific theatre team.

Please note this is about the **whole theatre team**, including surgeons, nurses, techs and anaesthetists.

**SA = Strongly Agree; A=Agree; N=Neutral; D=Disagree; SD=Strongly Disagree**

| In general, in theatres where I regularly work, senior staff (e.g. consultant surgeon and anaesthetist, senior nurse, charge tech): | SA        | A        | N        | D        | SD        |
|-------------------------------------------------------------------------------------------------------------------------------------|-----------|----------|----------|----------|-----------|
| 1. Provide clear directions to the team                                                                                             |           |          |          |          |           |
| 2. Use an appropriate balance of assertiveness and support                                                                          |           |          |          |          |           |
| 3. Motivate team members to do their best                                                                                           |           |          |          |          |           |
| 4. Establish a positive atmosphere in theatre                                                                                       |           |          |          |          |           |
| 5. Facilitate team problem solving during the case                                                                                  |           |          |          |          |           |
| 6. Role model acceptable interaction with colleagues                                                                                |           |          |          |          |           |
| 7. Engage in pre case briefings of the whole team                                                                                   |           |          |          |          |           |
| 8. Co-ordinate tasks and individual team member contributions to patient care                                                       |           |          |          |          |           |
| <b>Team members:</b>                                                                                                                | <b>SA</b> | <b>A</b> | <b>N</b> | <b>D</b> | <b>SD</b> |
| 9. Provide support to each other                                                                                                    |           |          |          |          |           |
| 10. Shift work responsibilities to underutilised team members at times of high workload                                             |           |          |          |          |           |
| 11. Keep an eye on other team members' performance                                                                                  |           |          |          |          |           |
| 12. Speak up about potential mistakes or lapses in other team members' plans or actions                                             |           |          |          |          |           |
| 13. Provide constructive feedback regarding team member actions to facilitate self-correction                                       |           |          |          |          |           |
| 14. Are willing to acknowledge mistakes and accept feedback                                                                         |           |          |          |          |           |
| 15. Value the input of all team members to patient care                                                                             |           |          |          |          |           |
| 16. Take into account alternative solutions offered by other team members                                                           |           |          |          |          |           |

|                                                                                                      |           |          |          |          |           |
|------------------------------------------------------------------------------------------------------|-----------|----------|----------|----------|-----------|
| 17. Share information about the case planning, progress and concerns with other team members         |           |          |          |          |           |
| 18. Involve the whole team in planning patient care                                                  |           |          |          |          |           |
| 19. Have a good understanding of the roles and abilities of their teammates                          |           |          |          |          |           |
| 20. Anticipate and predict each other's needs                                                        |           |          |          |          |           |
| 21. Have a lot of respect for each other                                                             |           |          |          |          |           |
| 22. Enjoy working together                                                                           |           |          |          |          |           |
| 23. Exchange information clearly and concisely                                                       |           |          |          |          |           |
| 24. Use names frequently when communicating information or allocating tasks                          |           |          |          |          |           |
| <b>Global rating</b>                                                                                 | <b>SA</b> | <b>A</b> | <b>N</b> | <b>D</b> | <b>SD</b> |
| 25. Overall, the theatre teams I work in demonstrate effective teamwork and communication behaviours |           |          |          |          |           |

**Comments**

Which hospital are you completing this survey for?

\_\_\_\_\_

What is your role in the operating theatre? (Please tick one)

|                         |                          |                              |                          |
|-------------------------|--------------------------|------------------------------|--------------------------|
| Consultant surgeon      | <input type="checkbox"/> | Surgical registrar/fellow    | <input type="checkbox"/> |
| Consultant anaesthetist | <input type="checkbox"/> | Anaesthetic registrar/fellow | <input type="checkbox"/> |
| Anaesthetic technician  | <input type="checkbox"/> | Theatre nurse                | <input type="checkbox"/> |
| Other (please specify)  | _____                    |                              |                          |

Male ☐ Female ☐

Which of the following best describes your ethnicity? (Please tick one)

|                        |                          |                |                          |
|------------------------|--------------------------|----------------|--------------------------|
| New Zealand European   | <input type="checkbox"/> | Māori          | <input type="checkbox"/> |
| Pacific Peoples        | <input type="checkbox"/> | Asian          | <input type="checkbox"/> |
| Asian Indian           | <input type="checkbox"/> | Other European | <input type="checkbox"/> |
| Other (please specify) | _____                    |                |                          |

**Thank you for taking the time to complete this survey**

© **Auckland UniServices Ltd 2017**
